# Supplementary material for: Randomized, Double-Blind, Placebo-Controlled Trial of Asenapine Maintenance Therapy in Adults With an Acute Manic or Mixed Episode Associated With Bipolar I Disorder
Source: Atypon-hosted journal article supplement (doi:10.1176/appi.ajp.2017.16040419), 2017-09-26
Supplement: appi.ajp.2017.16040419.ds001.pdf [file appi.ajp.2017.16040419.ds001.pdf]

Data supplement for Szegedi et al., Randomized, Double-Blind, Placebo-Controlled Trial of Asenapine Maintenance Therapy in Adults With an Acute Manic or Mixed Episode Associated With Bipolar I Disorder. Am J Psychiatry (doi: 10.1176/appi.ajp.2017.16040419)

### Supplemental (Online Only) Materials

Table S1. Number of subjects who met predefined limits of change in lipid and endocrine parameters.

#### A. Open-label period

| Parameter                        | Predefined limit of change                                      | Number of subjects | n  | %   |
|----------------------------------|-----------------------------------------------------------------|--------------------|----|-----|
| Prolactin, ng/mL                 | >4 x upper limit of normal                                      | 484                | 12 | 2.5 |
| Fasting total cholesterol, mg/dL | >50% above upper limit of normal                                | 482                | 15 | 3.1 |
| Fasting triglycerides, mg/dL     | >500 mg/dL                                                      | 424                | 7  | 1.7 |
| Fasting glucose, mg/dL           | >20% above upper limit of normal or below lower limit of normal | 484                | 31 | 6.4 |
| Glycosylated hemoglobin, %       | >7.5%                                                           | 470                | 10 | 2.1 |

#### B. Double-blind period

| Parameter                        | Predefined limit of change                                      | Placebo            |    |     | Asenapine          |    |     |
|----------------------------------|-----------------------------------------------------------------|--------------------|----|-----|--------------------|----|-----|
|                                  |                                                                 | Number of subjects | n  | %   | Number of subjects | n  | %   |
| Prolactin, ng/mL                 | >4 x upper limit of normal                                      | 119                | 3  | 2.5 | 124                | 4  | 3.2 |
| Fasting total cholesterol, mg/dL | >50% above upper limit of normal                                | 120                | 2  | 1.7 | 124                | 5  | 4.0 |
| Fasting triglycerides, mg/dL     | >500 mg/dL                                                      | 107                | 0  | 0.0 | 116                | 1  | 0.9 |
| Fasting glucose, mg/dL           | >20% above upper limit of normal or below lower limit of normal | 119                | 10 | 8.4 | 124                | 11 | 8.9 |
| Glycosylated hemoglobin, %       | >7.5%                                                           | 118                | 2  | 1.7 | 123                | 4  | 3.3 |
